# Supplementary material
Source: MDPI journal article supplement (https://www.mdpi.com/2073-4344/10/7/765)
Supplement: s1 [file s1]

Article

# Exploring the photothermo-catalytic performance of Brookite $\text{TiO}_2\text{-CeO}_2$ composites

## Supporting Information

### S1. XPS spectra

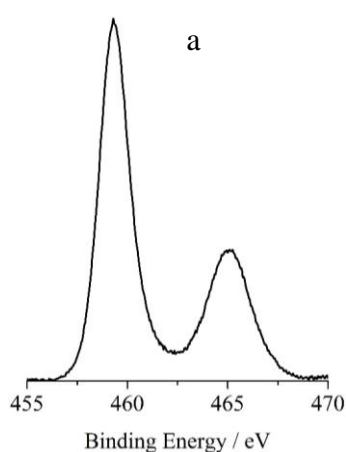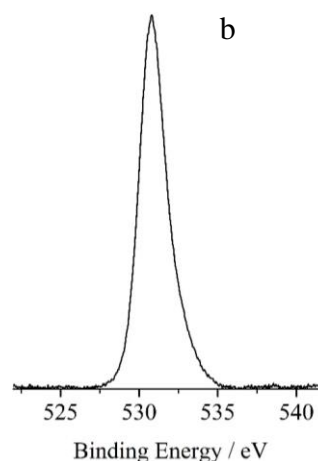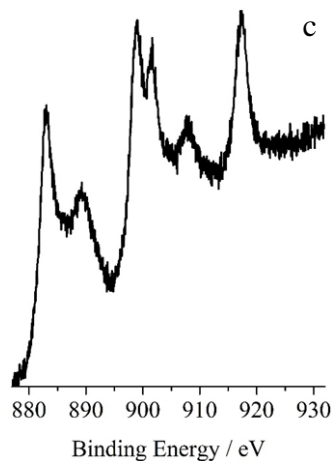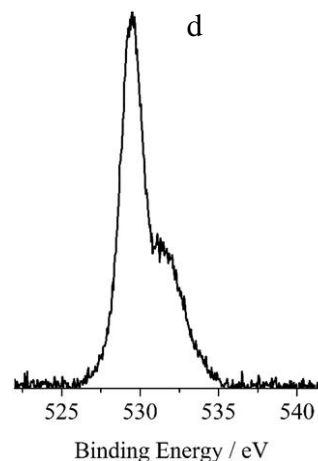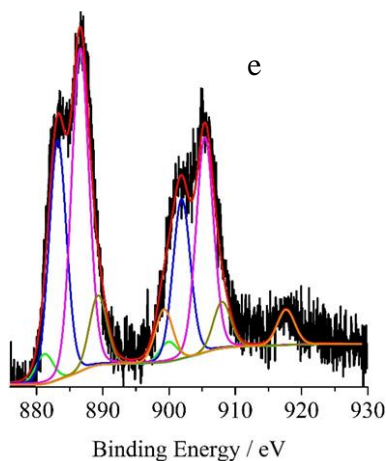

**Figure S1.** (a) Al K $\alpha$  excited XPS of the brookite TiO<sub>2</sub> sample, measured in the Ti 2p binding energy region; (b) Al K $\alpha$  excited XPS of the brookite TiO<sub>2</sub> blank, measured in the O 1s binding energy region; (c) Al K $\alpha$  excited XPS of the CeO<sub>2</sub> sample, measured in the Ce 3d binding energy region; (d) Al K $\alpha$  excited XPS of the CeO<sub>2</sub> sample, measured in the O 1s binding energy region; (e) Fitting of the Al K $\alpha$  excited XPS of the Ti/Ce5 sample, measured in the Ce 3d binding energy region. The 3d<sub>5/2</sub> - 3d<sub>3/2</sub> spin-orbit doublets at 883.2 - 901.8 (blue line), 889.4 - 908.0 (dark yellow line) and 899.0 - 917.5 (orange line) eV refer to the 3d<sup>9</sup>4f<sup>2</sup>(O 2p<sup>4</sup>), 3d<sup>9</sup>4f<sup>1</sup>(O 2p<sup>5</sup>) and 3d<sup>9</sup>4f<sup>0</sup>(O 2p<sup>6</sup>) Ce<sup>4+</sup> states, respectively. The 3d<sub>5/2</sub> - 3d<sub>3/2</sub> spin-orbit doublets at 881.2 - 899.8 (green line) and 886.5 - 905.1 (magenta line) eV refer to the 3d<sup>9</sup>4f<sup>1</sup>(O 2p<sup>6</sup>) and 3d<sup>9</sup>4f<sup>2</sup>(O 2p<sup>5</sup>) Ce<sup>3+</sup> states, respectively. The red line superimposed to the experimental black profile refers to the sum of all the Gaussian components. Structure due to satellite radiation has been subtracted from all the spectra.

## S2: Thermocatalytic oxidation of 2-propanol

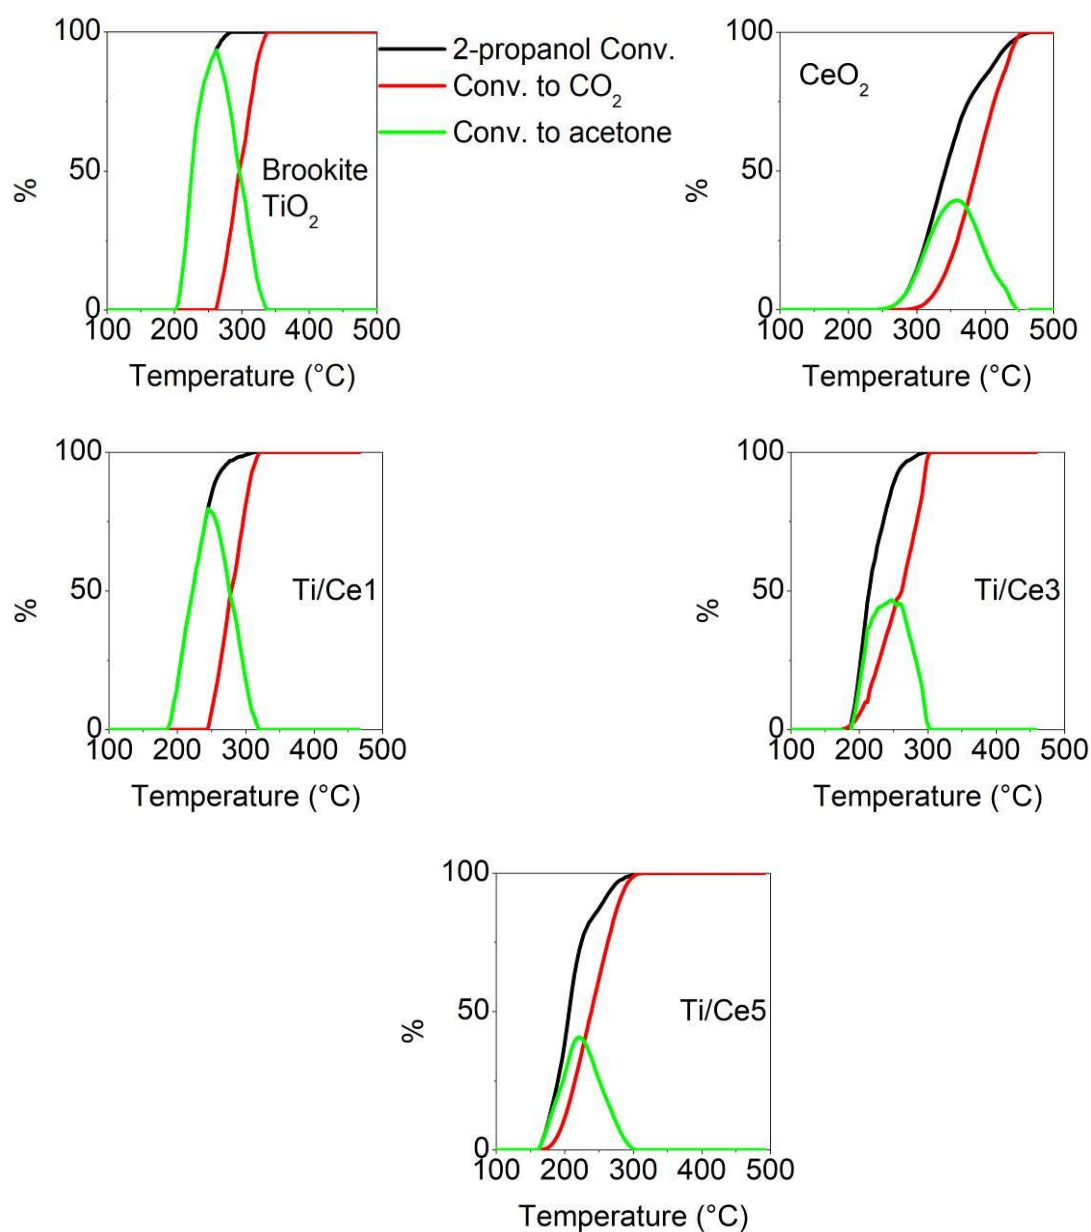

Figure S2. 2-propanol thermocatalytic oxidation over the investigated samples.

## S3: Photothermo-catalytic oxidation of 2-propanol

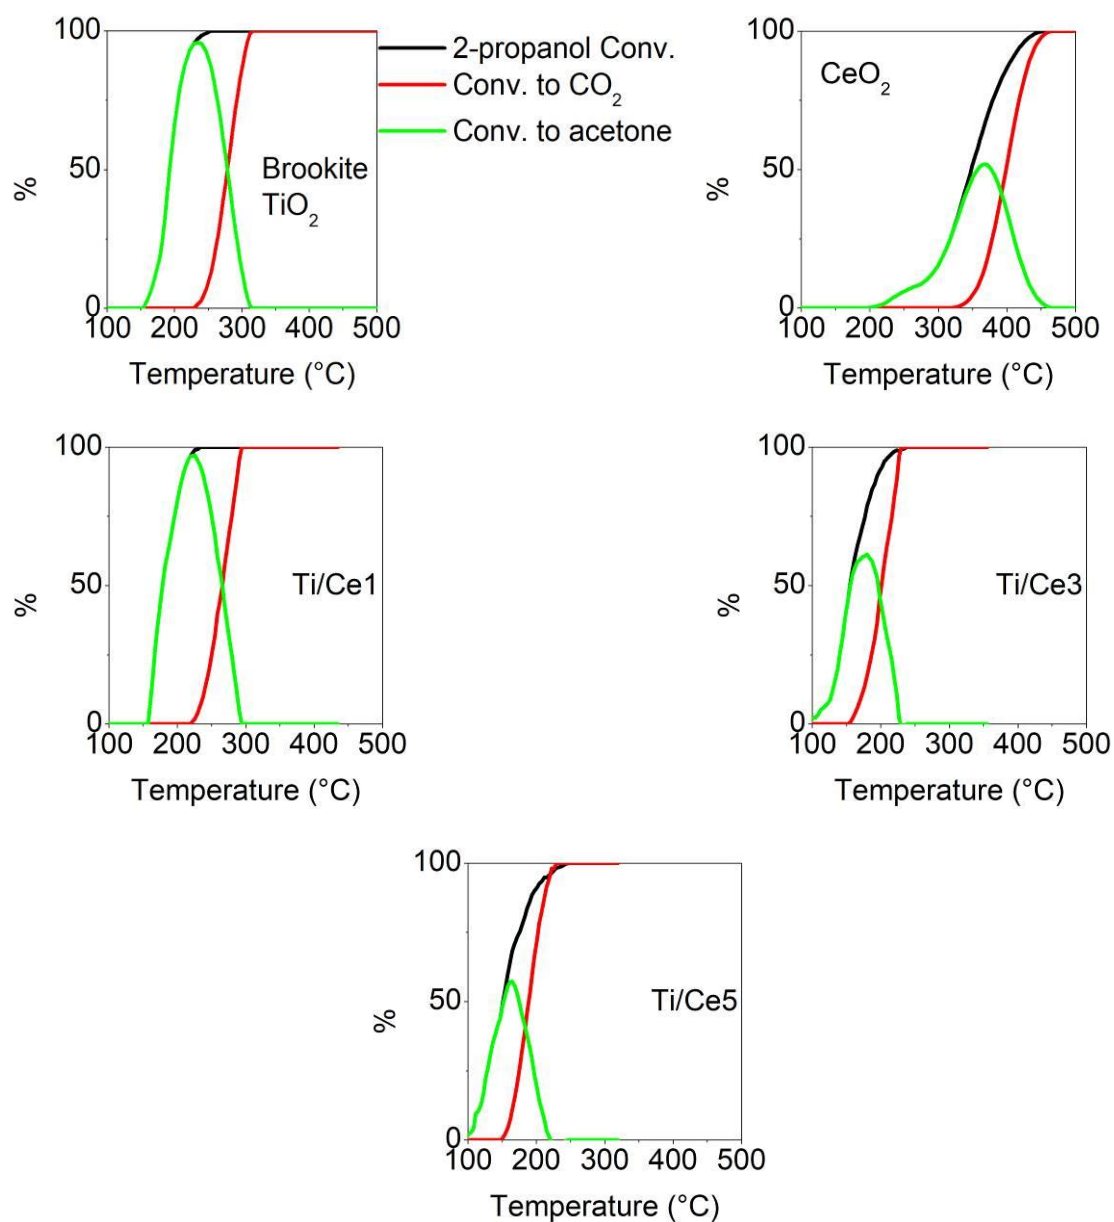

Figure S3. 2-propanol photothermo-catalytic oxidation over the investigated samples.

## S4: Thermocatalytic oxidation of ethanol

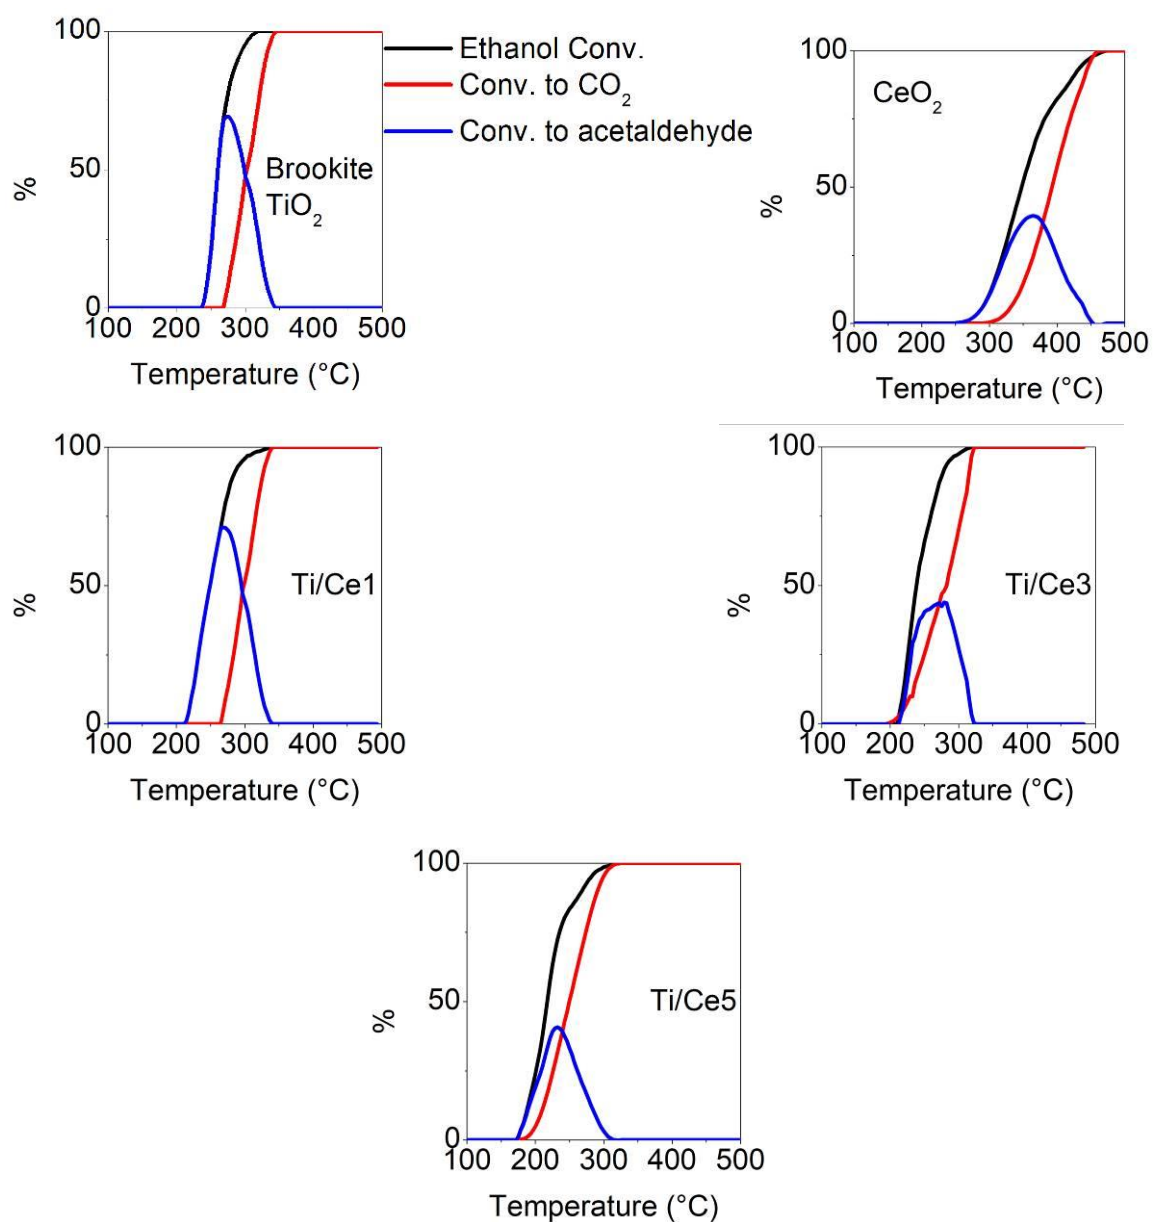

Figure S4 Ethanol thermocatalytic oxidation over the investigated samples.

## S5: Photothermo-catalytic oxidation of ethanol

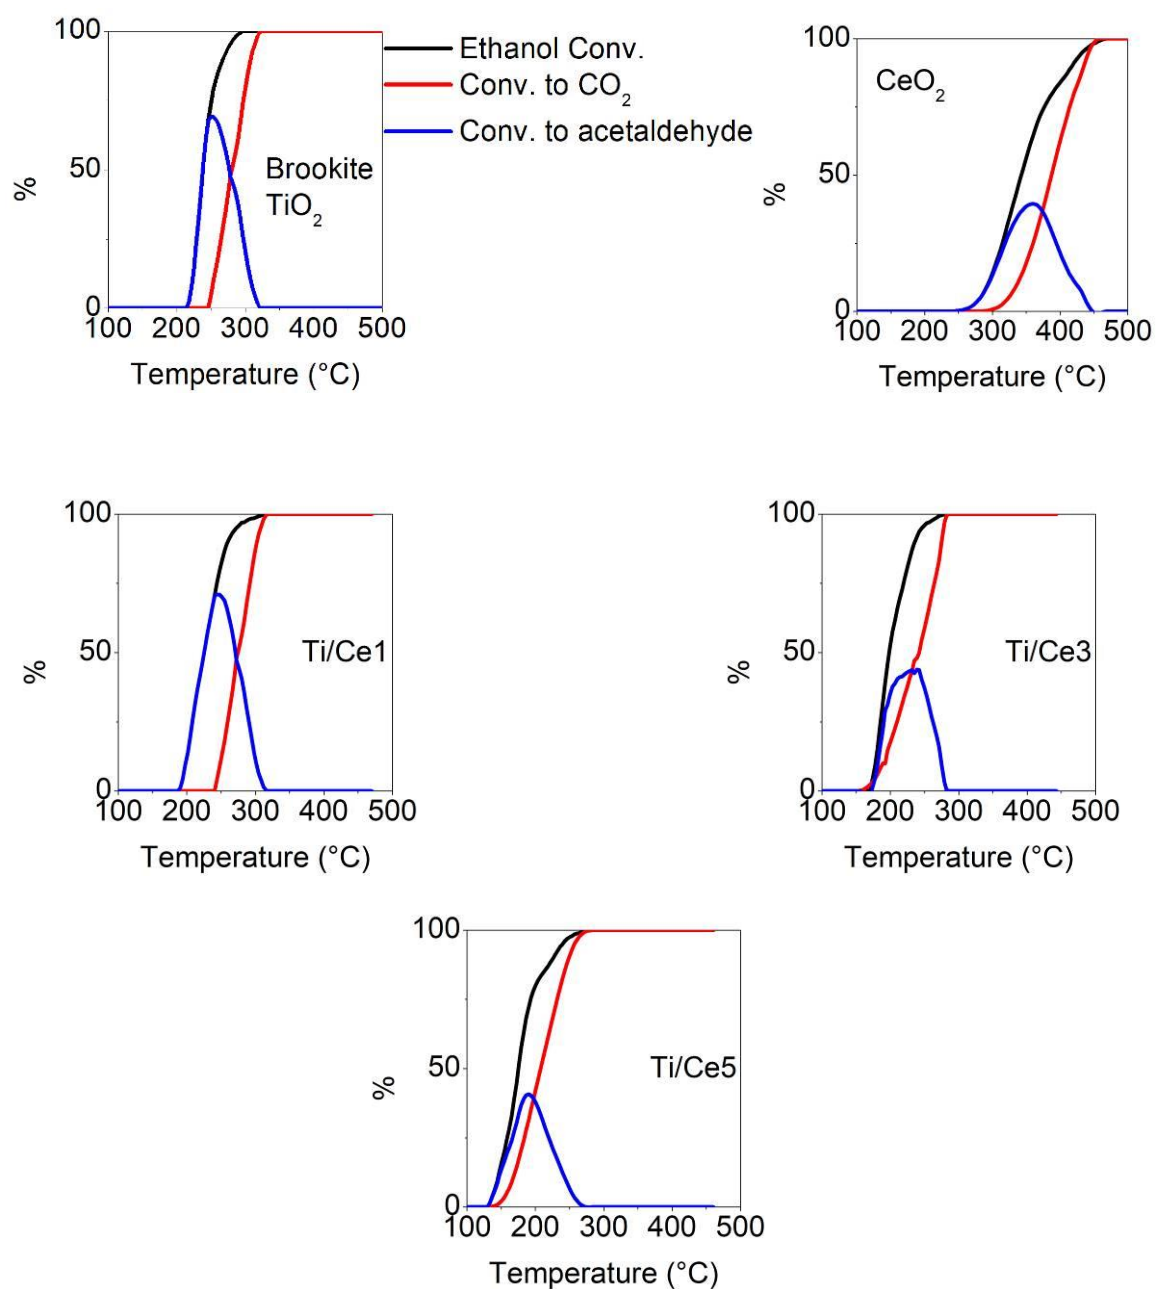

Figure S5 Ethanol photothermo-catalytic oxidation over the investigated samples.

**S6: XPS comparison of Ti/Ce5 composite before and after the photothermo-catalytic oxidation of 2-propanol and toluene.**

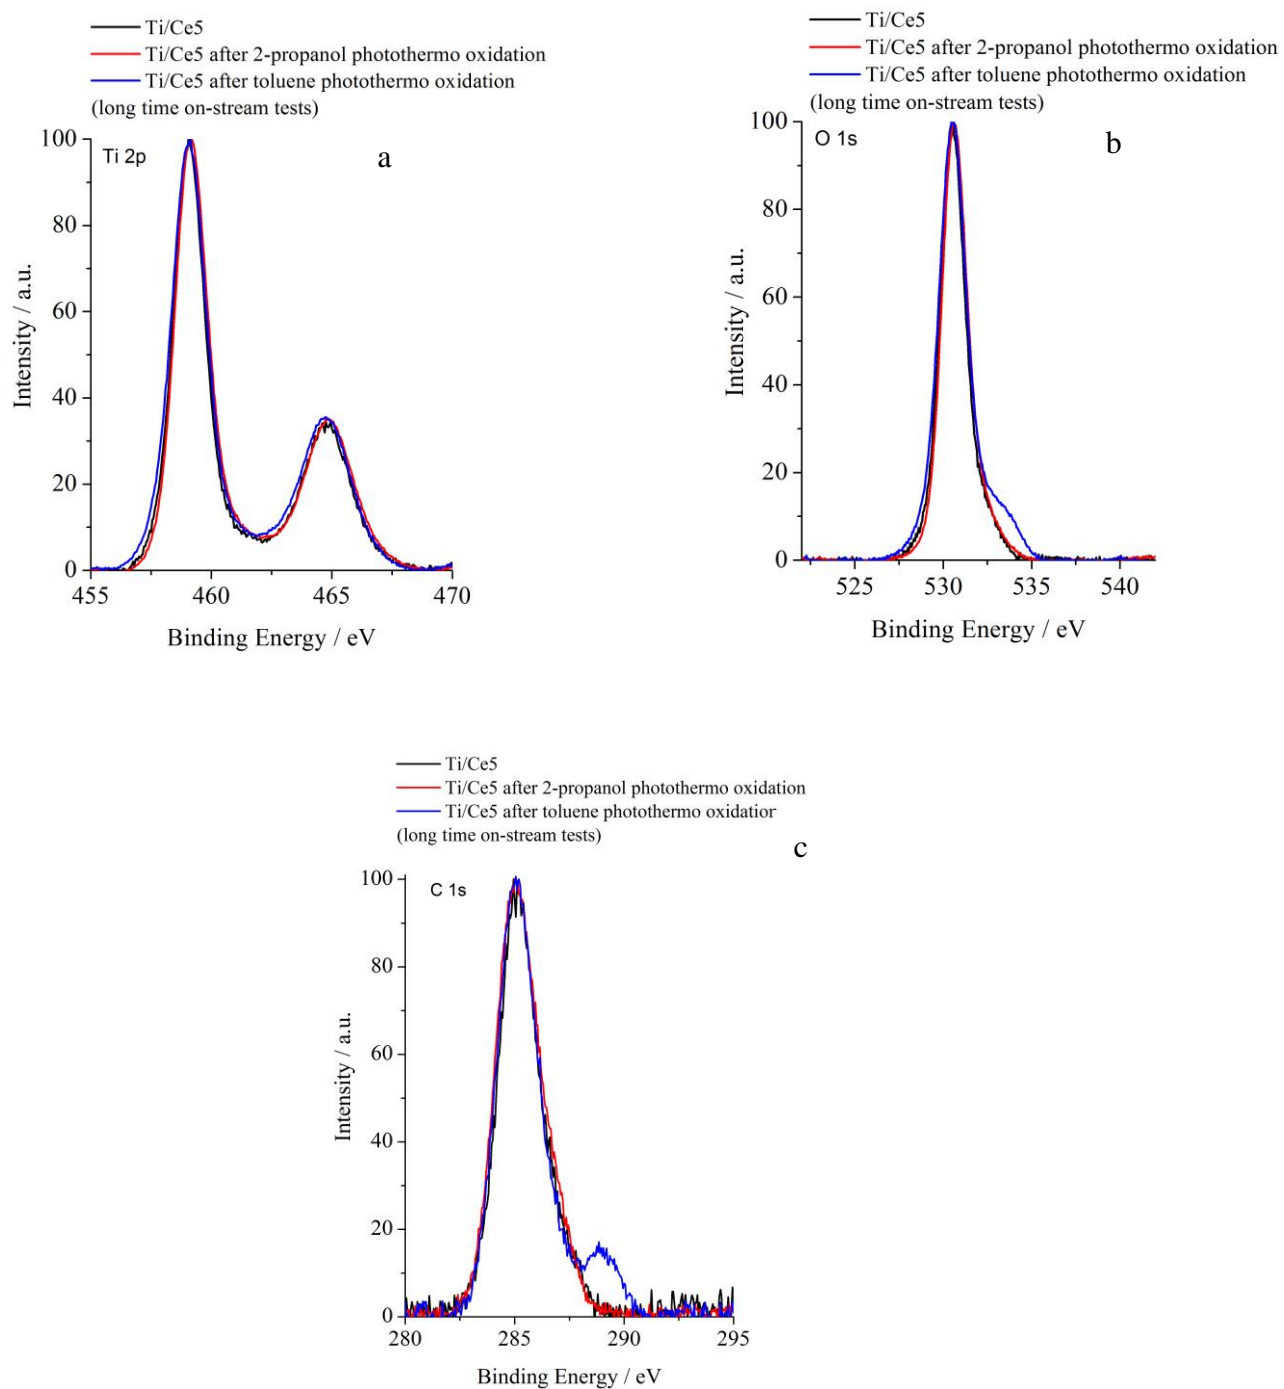

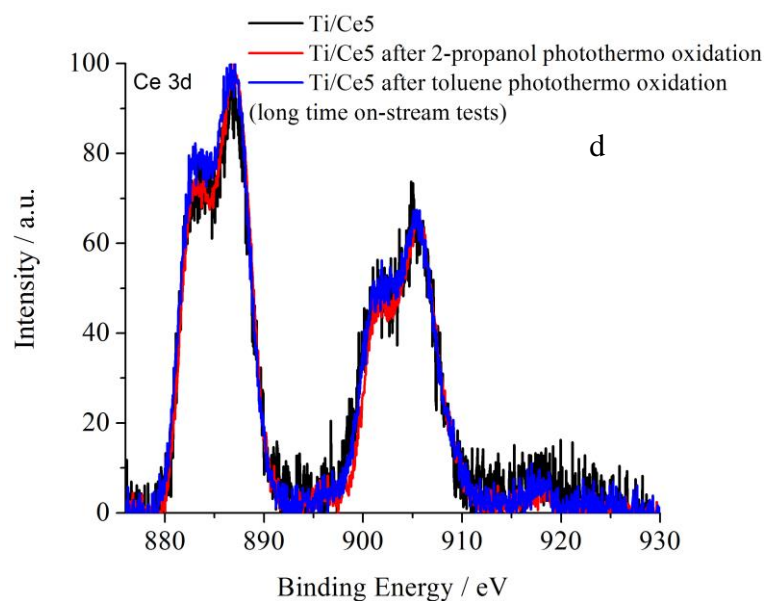

**Figure S6.** XPS spectra of the Ti/Ce5 sample before and after the photothermal catalytic oxidation of 2-propanol and toluene: (a) Ti 2p binding energy region; (b) O 1s binding energy region; (c) C 1s binding energy region; (d) Ce 3d binding energy region.
